# Supplementary material for: Metabolomics Provide Sensitive Insights into the Impacts of Low Level Environmental Contamination on Fish Health—A Pilot Study
Source: MDPI journal article supplement (doi:10.3390/metabo10010024), 2020-01-06

## **Metabolomics Provide Sensitive Insights into the Impacts of Low Level Environmental Contamination on Fish Health – a Pilot Study**

Sara M. Long \*

Dedreia L. Tull

David P. De Souza

Konstantinos A. Kouremenos

Saravanan Dayalan

Malcolm J. McConville

Kathryn L. Hassell

Vincent J. Pettigrove

Marthe Monique Gagnon

\* Corresponding author: Sara Long, Aquatic Environmental Stress Research Group, School of Science, RMIT-University, PO Box 71, Bundoora, 3083, Victoria, Australia.

Email address: [sara.long@rmit.edu.au](mailto:sara.long@rmit.edu.au)

## **Methods**

### Site Description

In the southeast of the Bay, the rural town of Sorrento is relatively clean and free of contamination, as no industrial discharges occur in the area. Similarly, St. Leonards has no industrial activities and low-density development nearby. In addition, these sites experience the most flushing as they are located close to the entrance of Port Phillip Bay to the ocean (Bass Strait). Sorrento and St Leonards were identified as 'rural sites' for this study. On the eastern side of the Bay, Mordialloc hosts dense residential developments as well as being the discharge site of a channel draining upstream agricultural and industrial areas. In the northernmost area, Hobsons Bay is located adjacent to the City of Melbourne which has the busiest container shipping port in Australia and is also where the Yarra River (the major river that flows through the City of Melbourne, with a catchment of > 4,000 km<sup>2</sup>) drains into Hobsons Bay. Finally, Corio Bay is in the westernmost side of the Bay, next to the City of Greater Geelong and a large oil refinery. Hence Mordialloc, Hobson Bay and Corio Bay were identified as 'urbanised sites' for this study

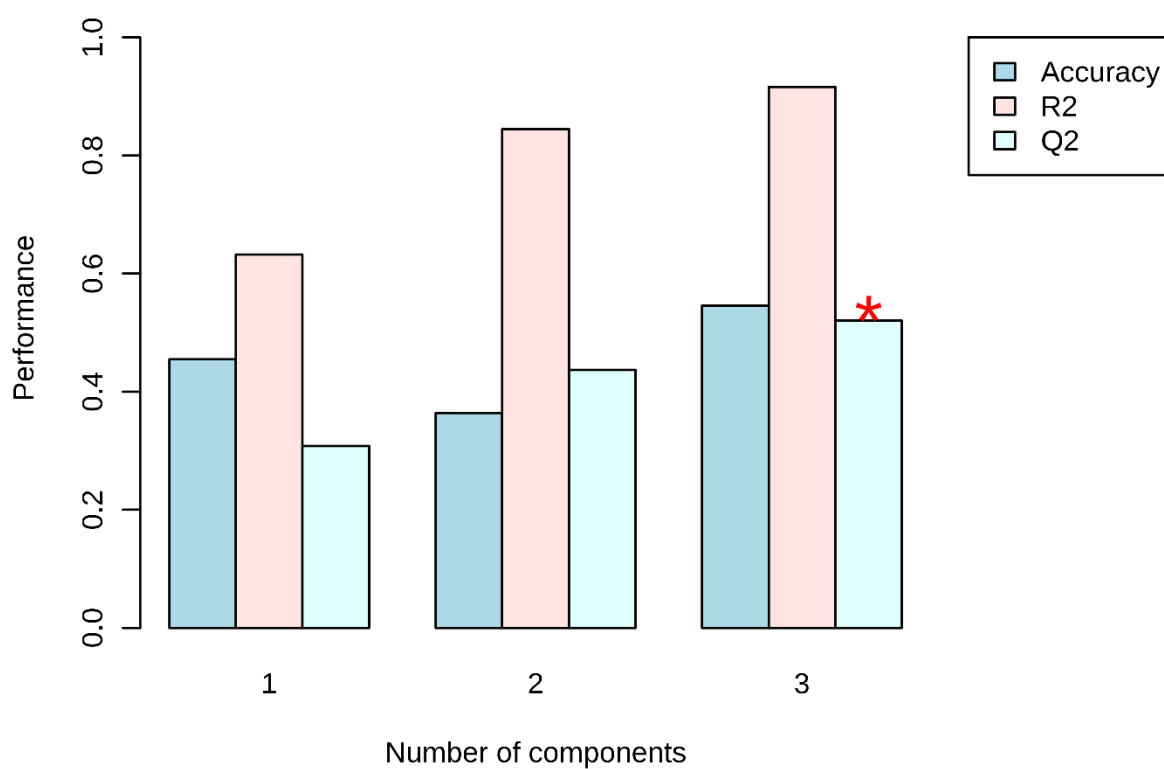

**Figure S1.** Cross-validation graph of PLS-DA for polar metabolites, according to Szymańska et al. [63].

**Table S1.** Cross-validation details of PLS-DA for polar metabolites, according to Szymańska et al. [63].

#### PLS-DA cross validation details:

| Measure  | 1 comps | 2 comps | 3 comps |
|----------|---------|---------|---------|
| Accuracy | 0.45455 | 0.36364 | 0.54545 |
| R2       | 0.63205 | 0.84467 | 0.91604 |
| Q2       | 0.30782 | 0.43687 | 0.52062 |

**Table S2.** Significant and trending polar metabolites (from ANOVA) detected in livers of female sand flathead (*Platycephalus bassensis*) collected from sites around Port Phillip Bay, Victoria, Australia in February-March 2015. Metabolites were considered significant if the FDR adjusted  $p$  value was  $<0.05$ . Metabolites were considered trending towards significance if FDR adjusted  $p$  value was  $<0.1$  but  $>0.05$  and  $p$  value was  $< 0.05$ .

| Metabolite             | $p$ value | FDR adjusted $p$ value | Comparison  |
|------------------------|-----------|------------------------|-------------|
| Lactic Acid            | 1.24E-05  | 0.000729               | Significant |
| Oxalic acid            | 6.43E-05  | 0.001898               | Significant |
| Proline 4-hydroxyl     | 0.000116  | 0.001949               | Significant |
| L-Alanine              | 0.000132  | 0.001949               | Significant |
| L-Threonine            | 0.000176  | 0.001982               | Significant |
| 3-Phosphoglyceric acid | 0.000202  | 0.001982               | Significant |
| L-Tyrosine             | 0.000936  | 0.007233               | Significant |
| Urea                   | 0.000981  | 0.007233               | Significant |
| Norleucine             | 0.003645  | 0.023347               | Significant |
| Glycine                | 0.003957  | 0.023347               | Significant |
| L-Aspartic acid        | 0.005841  | 0.029729               | Significant |
| Taurine                | 0.006047  | 0.029729               | Significant |
| Phosphoenolpyruvate    | 0.007879  | 0.035374               | Significant |
| L-Lysine               | 0.008394  | 0.035374               | Significant |
| L-Histidine            | 0.009231  | 0.036308               | Significant |
| D-Glucose              | 0.012685  | 0.046775               | Significant |
| Succinic acid          | 0.019906  | 0.067805               | Trending    |
| Citric acid            | 0.020686  | 0.067805               | Trending    |
| L-Ornithine            | 0.022536  | 0.069241               | Trending    |
| D-Gluconic Acid        | 0.023471  | 0.069241               | Trending    |
| Maleic acid            | 0.027081  | 0.073311               | Trending    |
| L-Phenylalanine        | 0.027336  | 0.073311               | Trending    |
| Glycerol-2-phosphate   | 0.029695  | 0.074144               | Trending    |
| L-Tryptophan           | 0.03016   | 0.074144               | Trending    |
| L-Methionine           | 0.03464   | 0.081532               | Trending    |
| Sorbitol               | 0.035929  | 0.081532               | Trending    |
| Hypoxanthine           | 0.039622  | 0.086582               | Trending    |

**Table S3.** Polar metabolites in livers of female sand flathead (*Platycephalus bassensis*) following Fishers LSD post hoc comparison. Values in bold show significantly different metabolites between the comparisons (FDR adjusted  $p < 0.05$ ), NS = not significantly different.

| Metabolite             | Comparison                        |                            |                              |                              |                                    |                                  |                                  |
|------------------------|-----------------------------------|----------------------------|------------------------------|------------------------------|------------------------------------|----------------------------------|----------------------------------|
|                        | St.<br>Leonard<br>s v<br>Sorrento | Corio<br>Bay v<br>Sorrento | Mordiallo<br>c v<br>Sorrento | Hobsons<br>Bay v<br>Sorrento | Corio<br>Bay v St.<br>Leonard<br>s | Mordiallo<br>c v St.<br>Leonards | Hobsons<br>Bay v St.<br>Leonards |
| 3-phosphoglyceric acid | NS                                | < 0.05                     | < 0.05                       | < 0.05                       | < 0.05                             | < 0.05                           | < 0.05                           |
| Glucose                | < 0.05                            | NS                         | < 0.05                       | NS                           | < 0.05                             | NS                               | < 0.05                           |
| Glycine                | < 0.05                            | < 0.05                     | < 0.05                       | NS                           | NS                                 | NS                               | < 0.05                           |
| Lactic acid            | < 0.05                            | < 0.05                     | < 0.05                       | < 0.05                       | < 0.05                             | < 0.05                           | NS                               |
| L-Alanine              | < 0.05                            | < 0.05                     | < 0.05                       | < 0.05                       | < 0.05                             | < 0.05                           | NS                               |
| L-Aspartic acid        | NS                                | NS                         | < 0.05                       | NS                           | NS                                 | < 0.05                           | NS                               |
| L-Histidine            | < 0.05                            | < 0.05                     | < 0.05                       | < 0.05                       | NS                                 | NS                               | NS                               |
| L-Lysine               | NS                                | < 0.05                     | < 0.05                       | < 0.05                       | NS                                 | NS                               | NS                               |
| L-Threonine            | < 0.05                            | < 0.05                     | < 0.05                       | < 0.05                       | NS                                 | NS                               | NS                               |
| L-Tyrosine             | < 0.05                            | < 0.05                     | < 0.05                       | < 0.05                       | < 0.05                             | NS                               | NS                               |
| Norleucine             | < 0.05                            | < 0.05                     | < 0.05                       | NS                           | NS                                 | NS                               | < 0.05                           |
| Oxalic acid            | < 0.05                            | < 0.05                     | < 0.05                       | < 0.05                       | NS                                 | NS                               | NS                               |
| Phosphoenolpyruvate    | NS                                | < 0.05                     | < 0.05                       | < 0.05                       | < 0.05                             | < 0.05                           | NS                               |
| Proline 4 hydroxyl     | < 0.05                            | < 0.05                     | < 0.05                       | < 0.05                       | NS                                 | NS                               | NS                               |
| Taurine                | < 0.05                            | NS                         | < 0.05                       | NS                           | < 0.05                             | NS                               | < 0.05                           |
| Urea                   | < 0.05                            | < 0.05                     | < 0.05                       | NS                           | NS                                 | NS                               | < 0.05                           |

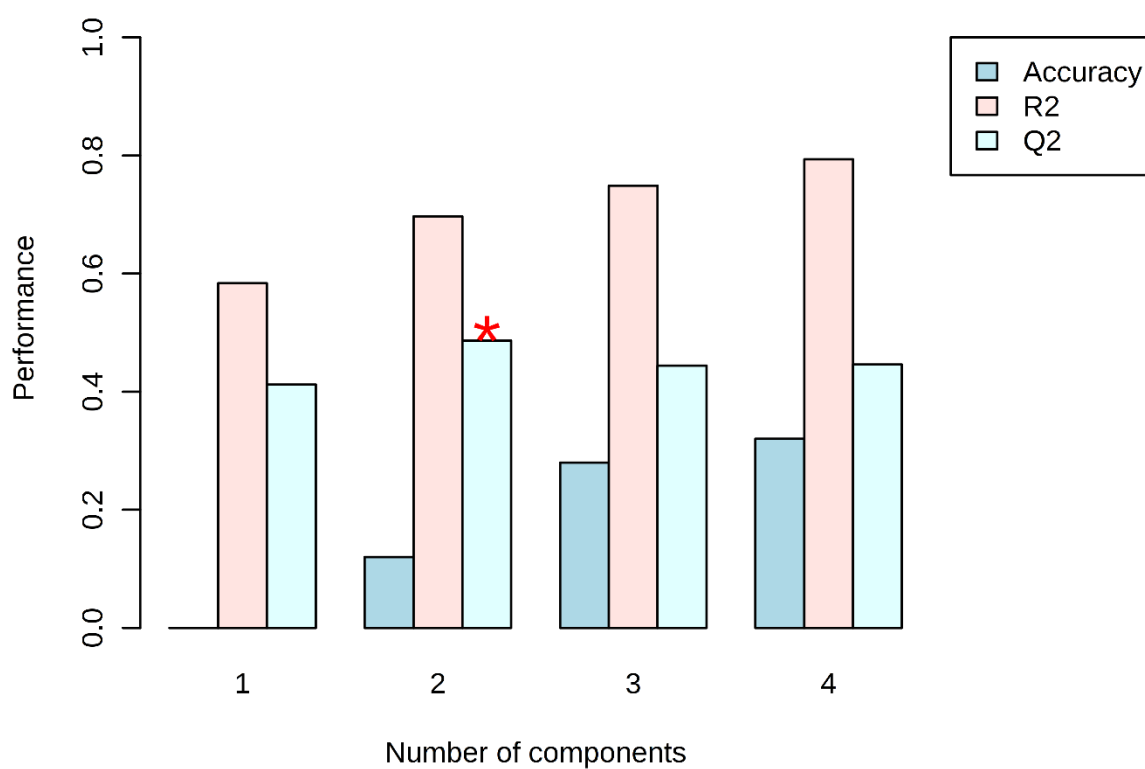

**Figure S3.** Cross-validation graph of PLS-DA for free fatty acid metabolites, according to Szymańska et al. [63].

**Table S4.** Cross-validation details of PLS-DA for free fatty acid metabolites, according to Szymańska et al. [63].

**PLS-DA cross validation details:**

| Measure  | 1 comps | 2 comps | 3 comps | 4 comps |
|----------|---------|---------|---------|---------|
| Accuracy | 0.0     | 0.12    | 0.28    | 0.32    |
| R2       | 0.58349 | 0.69686 | 0.74871 | 0.79381 |
| Q2       | 0.41195 | 0.48636 | 0.44416 | 0.44579 |

**Table S5.** Significant and trending free fatty acid metabolites from ANOVA detected in livers of female sand flathead (*Platycephalus bassensis*) collected from different sites around Port Phillip Bay, Victoria, Australia in February-March 2015. Metabolites were considered significant if the FDR adjusted *p* value was <0.05. Metabolites were considered trending towards significance if FDR adjusted *p* value was <0.1 but >0.05 and *p* value was < 0.05.

| Metabolite | <i>p</i> value | FDR adjusted <i>p</i> value | Comparison  |
|------------|----------------|-----------------------------|-------------|
| C18:3      | 0.00207        | 0.032373                    | Significant |
| C21:0      | 0.002398       | 0.032373                    | Significant |
| C15:0      | 0.008616       | 0.061134                    | Trending    |
| C22:0      | 0.009057       | 0.061134                    | Trending    |
| C17:0      | 0.015188       | 0.082013                    | Trending    |

**Table S6.** Free fatty acid metabolites in livers of female sand flathead (*Platycephalus bassensis*) following Fishers LSD post hoc comparison. Values in bold show statistically significantly different metabolites ( $p < 0.05$ ).

| Metabolite         | Comparison                 |                          |                              |                                |                                  |                              |                                    |
|--------------------|----------------------------|--------------------------|------------------------------|--------------------------------|----------------------------------|------------------------------|------------------------------------|
|                    | Corio<br>Bay<br>v Sorrento | Mordialloc<br>v Sorrento | Hobsons<br>Bay<br>v Sorrento | Corio<br>Bay v St.<br>Leonards | Hobsons<br>Bay v St.<br>Leonards | Mordialloc<br>v Corio<br>Bay | St.<br>Leonards<br>v<br>Mordialloc |
| C21:0 <sup>a</sup> | < 0.05                     | < 0.05                   | < 0.05                       | < 0.05                         | < 0.05                           | < 0.05                       | NS                                 |
| C18:3 <sup>b</sup> | < 0.05                     | < 0.05                   | < 0.05                       | < 0.05                         | < 0.05                           | NS                           | < 0.05                             |

<sup>a</sup> – saturated fatty acid

<sup>b</sup> – unsaturated fatty acid



**Table S7.** Mean temperature (°C) and total phytoplankton counts (cells/L) at sites in Port Phillip Bay, Summer 2014/2015 (Paula Sardina, EPA Victoria)

| Site        | Number of<br>sampling events | Temperature °C<br>(Range) | Total Phytoplankton<br>cells/L (SD) |
|-------------|------------------------------|---------------------------|-------------------------------------|
| Sorrento    | 1                            | 18.8                      | 884,005                             |
| St Leonards | 1                            | 20.6                      | NM                                  |
| Corio Bay   | 4                            | 19.2 (17.1 – 21.7)        | 230,457 (153384)                    |
| Mordialloc  | 2                            | 18.7 (17.1 – 20.4)        | 1,090,057 (528884)                  |
| Hobsons Bay | 4                            | 19.5 (17.6 – 22.4)        | 1,623,374 (1525082)                 |

NM – not measured

**Figure S2.** Boxplots showing abundance of significant (FDR adjusted  $p$  value  $< 0.05$ ) polar (a) or free fatty acid (b) metabolites in livers of sand flathead (*Platycephalus bassensis*) sampled at sites around Port Phillip Bay, Victoria, Australia.

Figure S2a

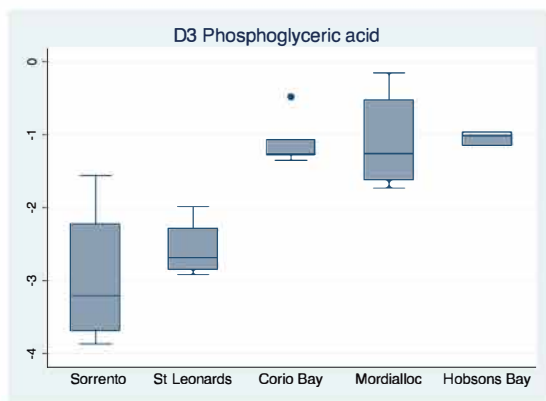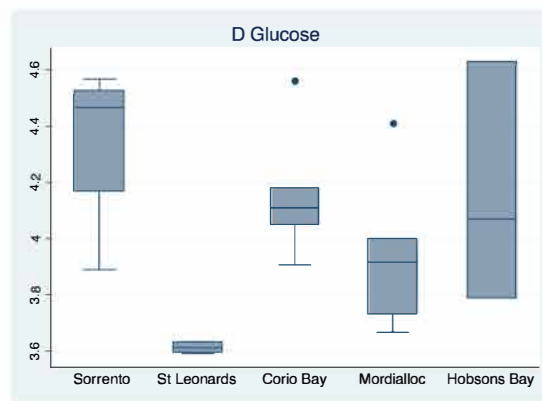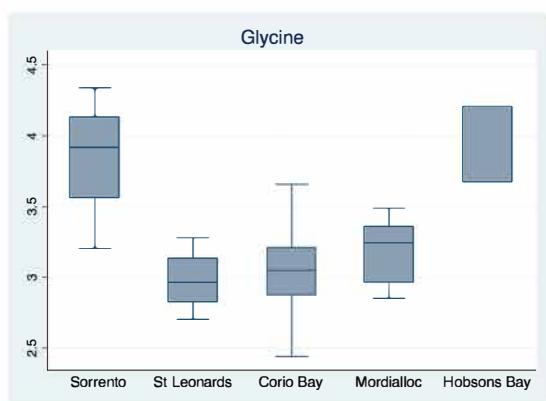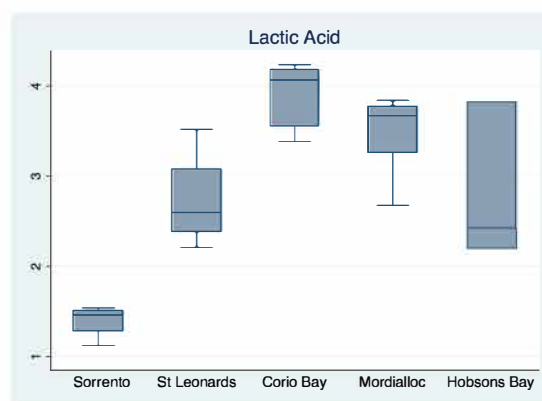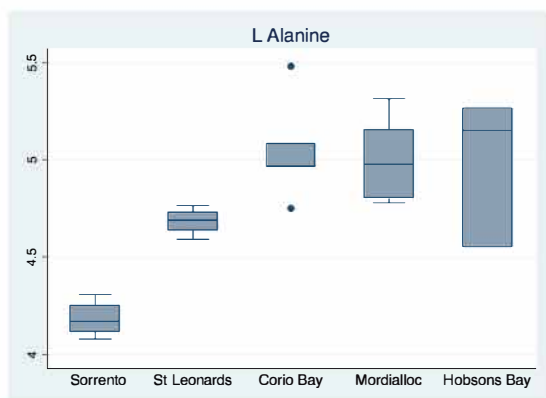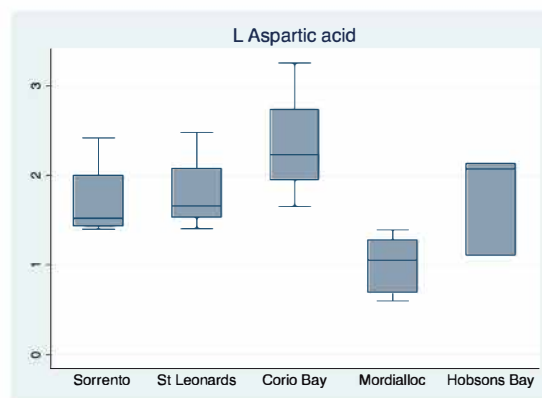

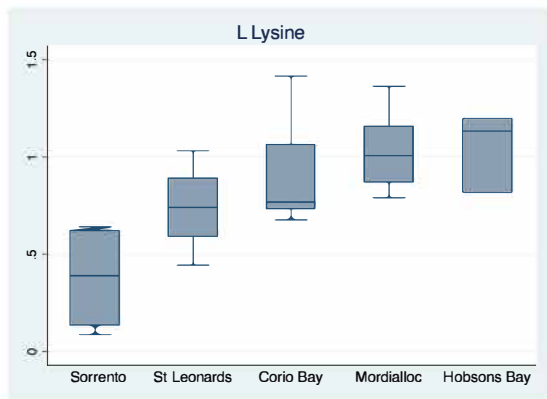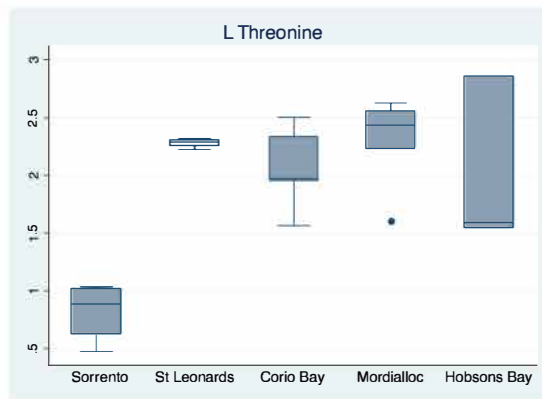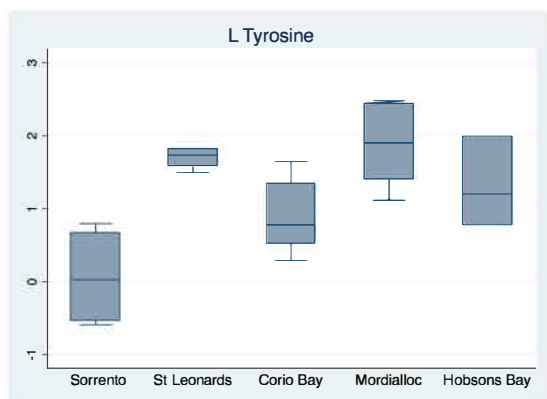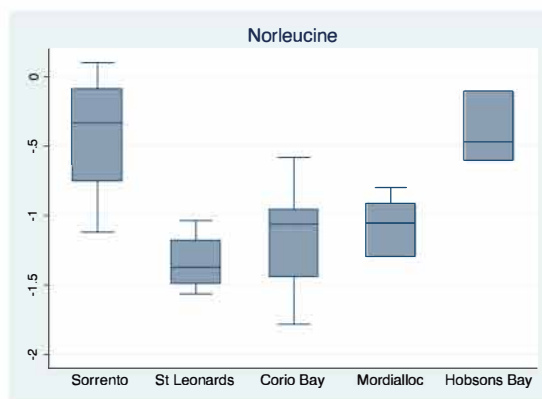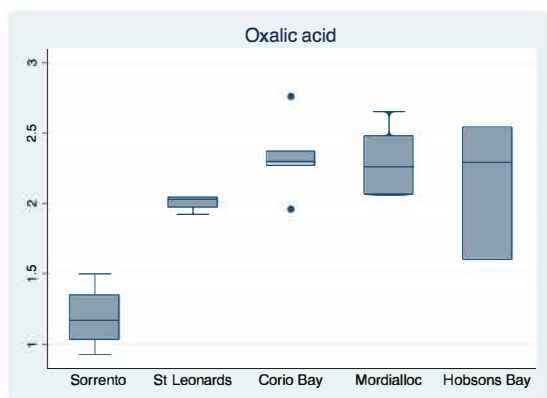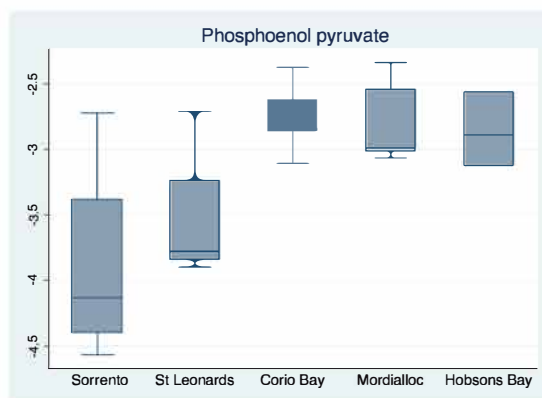

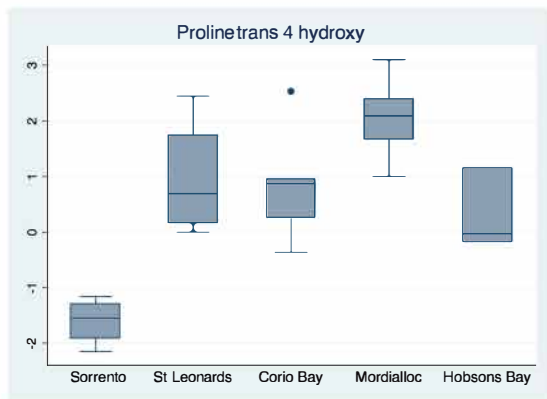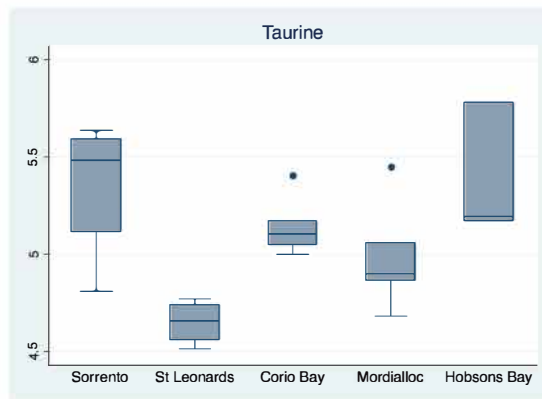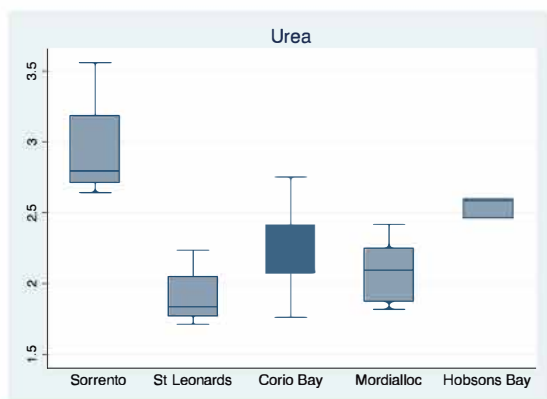

Figure 2b

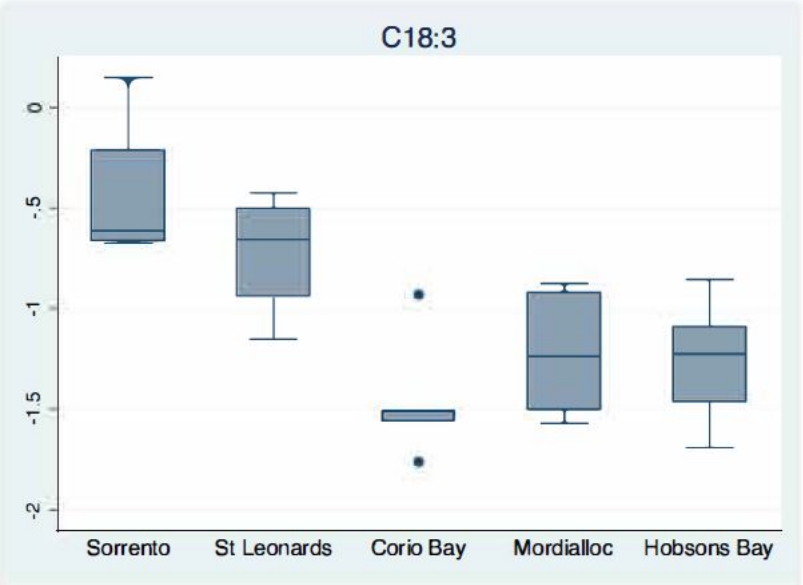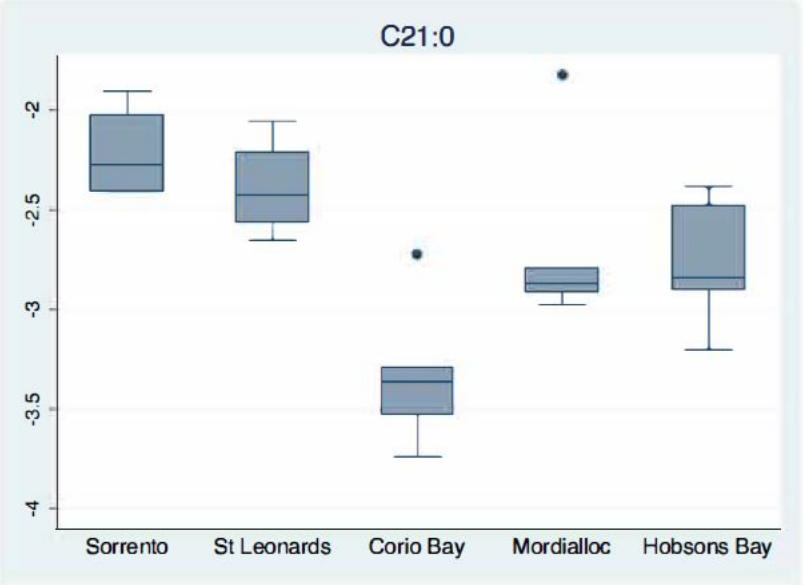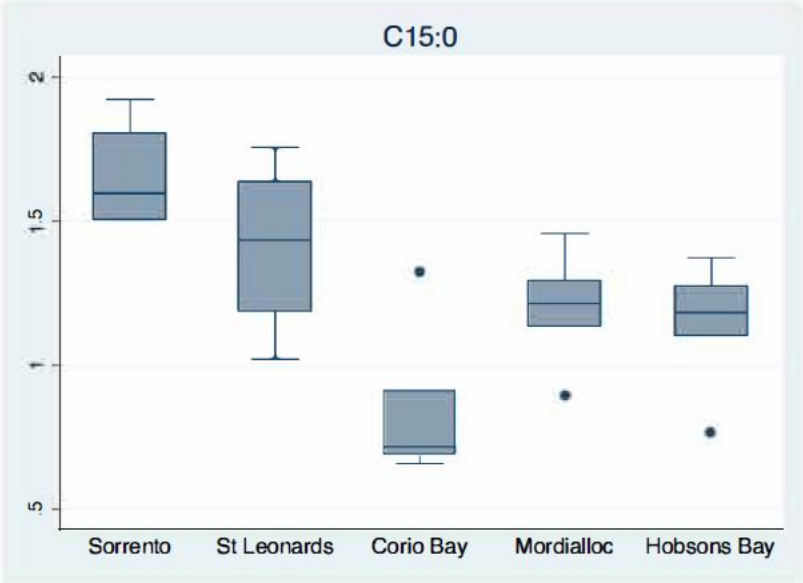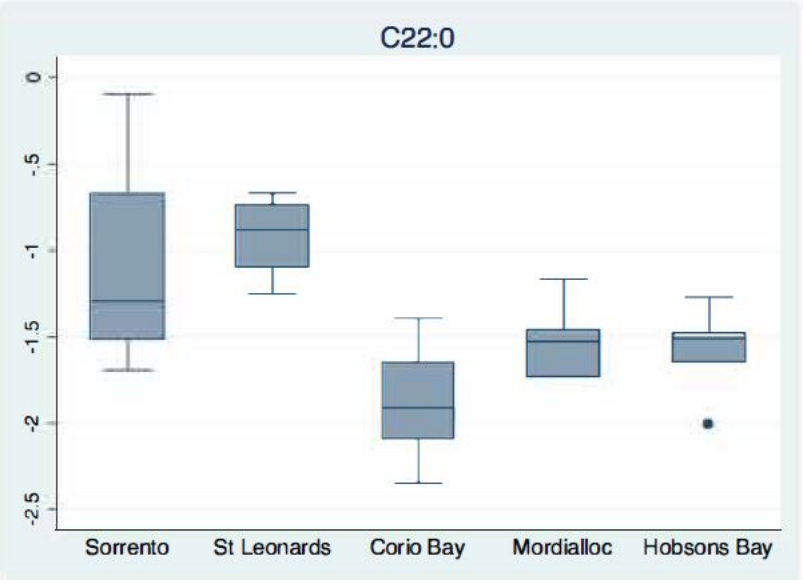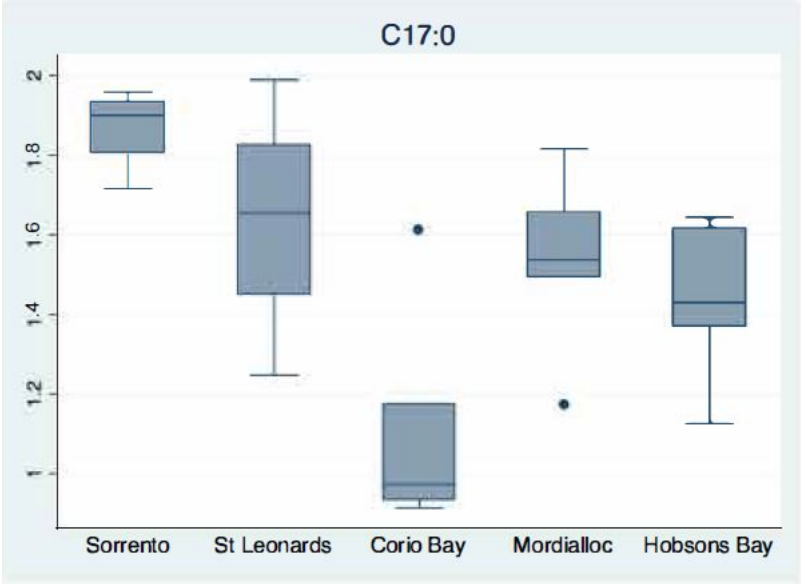

Supplement: s1 [file s1]
